# Supplementary material for: The Role of β-Dystroglycan in Nuclear Dynamics
Source: MDPI journal article supplement (doi:10.3390/cells13050431), 2024-02-29
Supplement: s1 [file s1]

Supplementary Table S1. List of primary antibodies used

| Antibody name / target | Antigen         | Host species | Isotype    | Clone   | Dilution WB | Dilution IF | Source             |
|------------------------|-----------------|--------------|------------|---------|-------------|-------------|--------------------|
| MANDAG2                | Ct $\beta$ DG   | Mouse        | IgG1       | MANDAG2 | 500         | 100         | [58]               |
| 1709                   | P892 $\beta$ DG | Rabbit       |            |         | 500         | 200         | [57]               |
| C20                    |                 | Goat         |            |         |             | 250         | SCBT               |
| LG5                    | Ct $\beta$ DG   | Rabbit       |            |         | 500         | 500         | D. Mornet lab      |
| JAF1                   | Ct $\beta$ DG   | Rabbit       |            |         | 500         | 500         | [60]               |
| Calnexin               |                 | Rabbit       |            |         | 500         | 200         | Abcam Ab22595      |
| $\gamma$ H2AX          |                 | Mouse        |            | JBW301  |             | 250         | EMD Millipore      |
| Myc                    |                 | Mouse        | IgG1       | 9E10    | 5000        | 1000        | Millipore          |
| HA                     |                 | Rat          | IgG1       | 3F10    | 1000        | 500         | Sigma              |
| V5                     |                 | Mouse        | IgG2a      |         | 1000        | 1000        | Invitrogen R960-25 |
| GAPDH                  |                 | Rabbit       | Polyclonal |         |             |             | Abcam ab9485       |

Supplementary Table S2. List of secondary antibodies used

| Target           | Conjugation     | Use | Dilution IF | Dilution WB | Source            |
|------------------|-----------------|-----|-------------|-------------|-------------------|
| anti-Mouse IgG1  | Alexa Fluor 568 | IF  | 500         |             | Life Technologies |
| anti-Mouse IgG2a | Alexa Fluor 647 | IF  | 500         |             | Life Technologies |

|               |                 |    |     |        |                   |
|---------------|-----------------|----|-----|--------|-------------------|
| anti-Rat IgG1 | Alexa Fluor 488 | IF | 500 |        | Life Technologies |
| anti-Rabbit   | Alexa Fluor 647 | IF | 500 |        | Life Technologies |
| anti-goat     | Alexa Fluor 488 | IF | 500 |        | Life Technologies |
| Anti-mouse    | HRP             | WB |     | 10,000 | Dako              |
| Anti-Rat      | HRP             | WB |     | 10,000 | Dako              |
| Anti-Rabbit   | HRP             | WB |     | 10,000 | Dako              |

Supplementary Table S3. Primers used in this study

| Primer Name     | Sequence                                                               | Purpose                         |
|-----------------|------------------------------------------------------------------------|---------------------------------|
| $\alpha$ -DG fw | AGGATGTCTGTGGCCTCTCGCTGCT                                              | Amplification cDNA dystroglycan |
| $\beta$ -DG rev | AGGTGGGACATAGGGAGGAGGTGA                                               | Amplification cDNA dystroglycan |
| V5 insert FW    | GGTAAGCCTATCCCTAACCCTCTCCTCGGTCTCGATTCTAC-<br>GGTGGGTGACCCGGCACTGGTGTG | Overlap PCR: insertion V5-tag   |
| V5 insert RV    | CGTAGAATCGAGACCGAGGAGAGGGTTAGGGATAGGCTTACCAAACCT-<br>GGCCTTGAACCTTGCAG | Overlap PCR: insertion V5-tag   |
| HA insert FW    | TACCCATACGATGTTCCAGATTACGCTAGGAGAGTGCCCTCAGAGGC                        | Overlap PCR: insertion HA-tag   |
| HA insert RV    | CAGTTTATCCCTGTGGTACCACCCTACCCATACGATGTTCCAGATTACGCT                    | Overlap PCR: insertion HA-tag   |
| Myc insert FW   | GAACAAAACTCATCTCAGAAGAGGATCTGATGGGAGAGTACACGCCCCT<br>G                 | Overlap PCR: insertion myc-tag  |

|                           |                                                      |                                      |
|---------------------------|------------------------------------------------------|--------------------------------------|
| Myc insert RV             | CAGATCCTCTTCTGAGATGAGTTTTTGTTCGGTGTCTTGGTTCAGAGGAGTG | Overlap PCR: insertion myc-tag       |
| FL $\beta$ -DG trunc.     | TCCTGCAGGCGCGCCCGCCACCATGTCCATCGTGGTGAATGGACCAACA    | DG truncation: HA $\beta$ myc-DG     |
| $\beta$ -DG (cyto) trunc. | TGCGCAAGGCGCGCCCGCCACCATGCGCAAGAAGCGGAAGGGC          | DG truncation: $\beta$ myc-DG (cyto) |
| DAG1 Cas9 FW seq          | AAGGAGTTGCACGAAACTGTTGGTT                            | PCR Cas9 target region               |
| DAG1 Cas9 RV seq          | GAACACTGATTTAGGGATTTGTTGGA                           | PCR Cas9 target region               |

Supplementary Table S4. List of plasmids used / generated

| Plasmid name                               | Source     |
|--------------------------------------------|------------|
| pX458-gRNA-DG1                             | [59]       |
| pX458-gRNA-DG2                             | [59]       |
| pcDNA3.1- $\alpha$ V5-HA $\beta$ mycDG     | This study |
| pcDNA3.1- $\alpha$ V5- $\beta$ DG          | This study |
| pcDNA3.1- $\alpha$ -HA $\beta$ DG          | This study |
| pcDNA3.1- $\alpha$ - $\beta$ mycDG         | This study |
| pcDNA3.1-delta- $\alpha$ -HA $\beta$ mycDG | This study |
| pcDNA3.1- $\beta$ mycDG (cyto)             | This study |
| pcDNA3.1- $\alpha$ -HA $\beta$ mycDG       | This study |

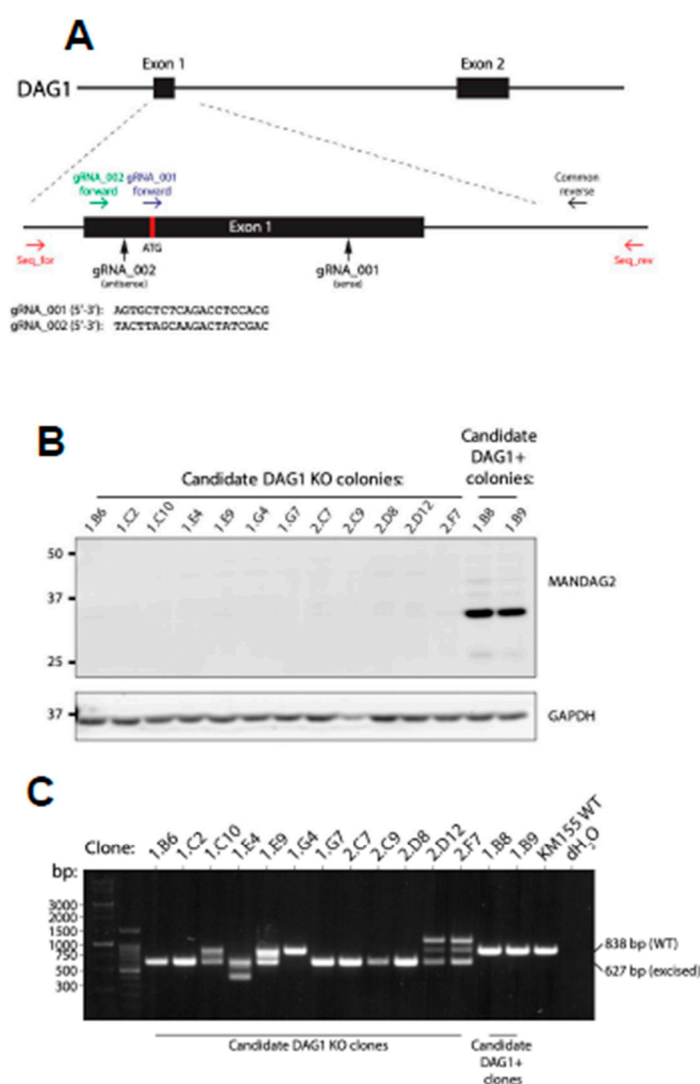

Supplementary Figure S1: Generating DAG1 KO KM155 myoblasts using CRISPR/Cas9.

- A. DAG1 CRISPR KO strategy - schematic representation of DAG1 gene structure, indicating start codon (ATG) and positions of the targets for gRNAs. PCR primers (seq-for and seq-rev) and sequencing primers (gRNA\_002 and gRNA\_001 for) are also displayed.
- B. Putative DAG1 KO clones were harvested from cell pellets and analysed by western blotting and probing for  $\beta$ DG using MANDAG2.
- C. Genomic DNA was extracted and PCR amplified using seq-for and seq-rev primers in DAG1 KO clones and WT controls, and separated by agarose gel electrophoresis. Bands were gel extracted and cloned into TOPO-TA vectors for Sanger sequencing analysis of mutation induced and zygosity.

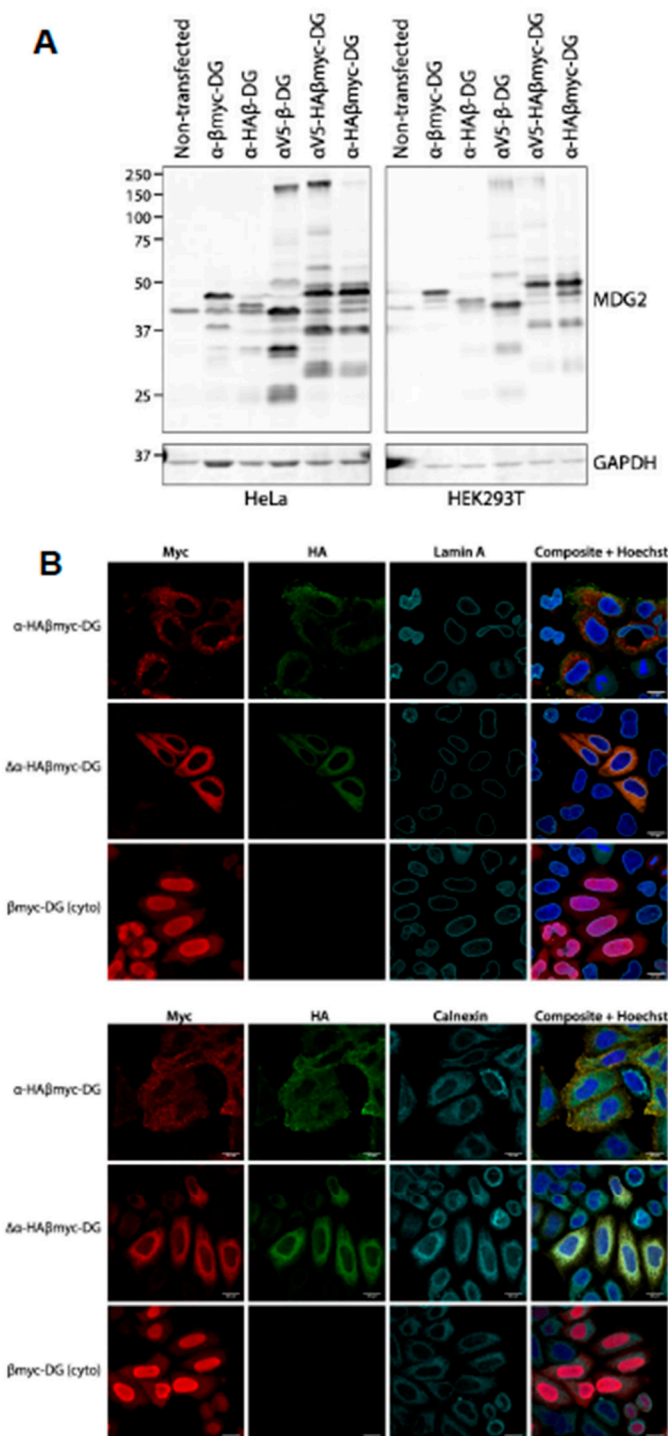

Supplementary Figure S2:  $\alpha$ DG V5 tag placement impedes autoproteolysis

A.  $\alpha$ DG V5 epitope tag placement impedes autoproteolysis. Epitope-tag placement in the carboxy-terminus of  $\alpha$ -dystroglycan and throughout  $\beta$ -dystroglycan. HeLa and 293T were transfected with dystroglycan constructs containing indicated epitope tags and subject to SDS- PAGE. High molecular weight dystroglycan bands were detected using the MANDAG2 antibody.

B. Expression of dystroglycan fragments results in differential localisations. HeLa cells were transfected with either  $\alpha$ -HA $\beta$ myc-DG, Delta- $\alpha$ -HA $\beta$ myc-DG or  $\beta$ myc-DG (cyto), and stained with indicated antibodies to detect the epitope tags. Subcellular structures were also stained; the nuclear envelope was delineated with a stain for lamin A (upper), while the ER network highlighted with calnexin (lower). Scale bar = 20  $\mu$ m

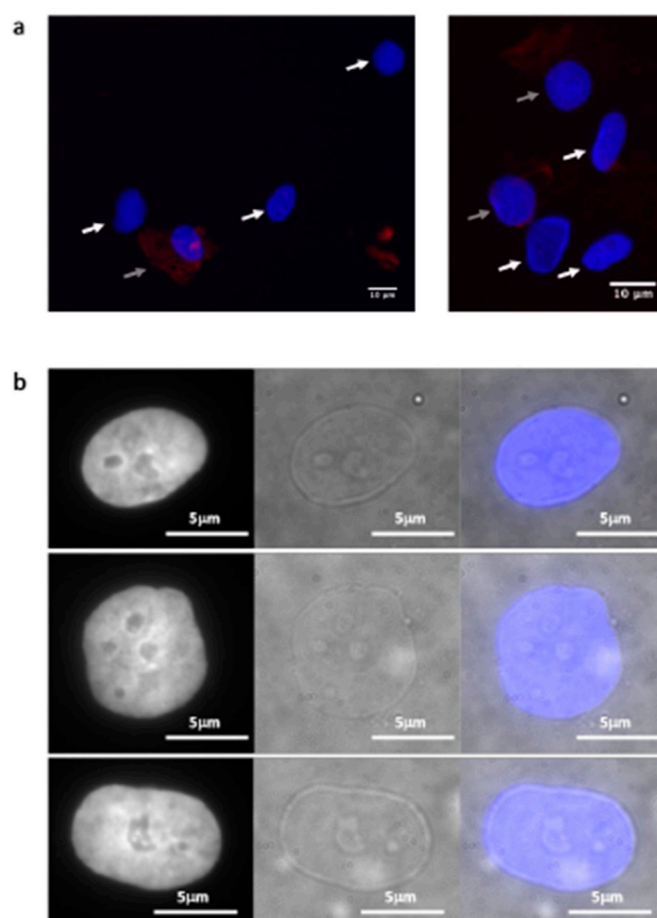

Supplementary Figure S3: Validation of nuclear isolation.

A. Representative nuclear isolation preparation stained with DAPI and phalloidin to identify the nucleus and any surrounding actin filaments indicative of cytoplasmic contamination. Cells lacking any phalloidin staining are indicated with white arrows while cells with some phalloidin staining remaining are indicated with grey arrows. Scale bar = 10 μm.

B. Representative brightfield microscopy images of isolated nuclei with no surrounding cytoplasmic contaminants. Scale bar = 5 μm.

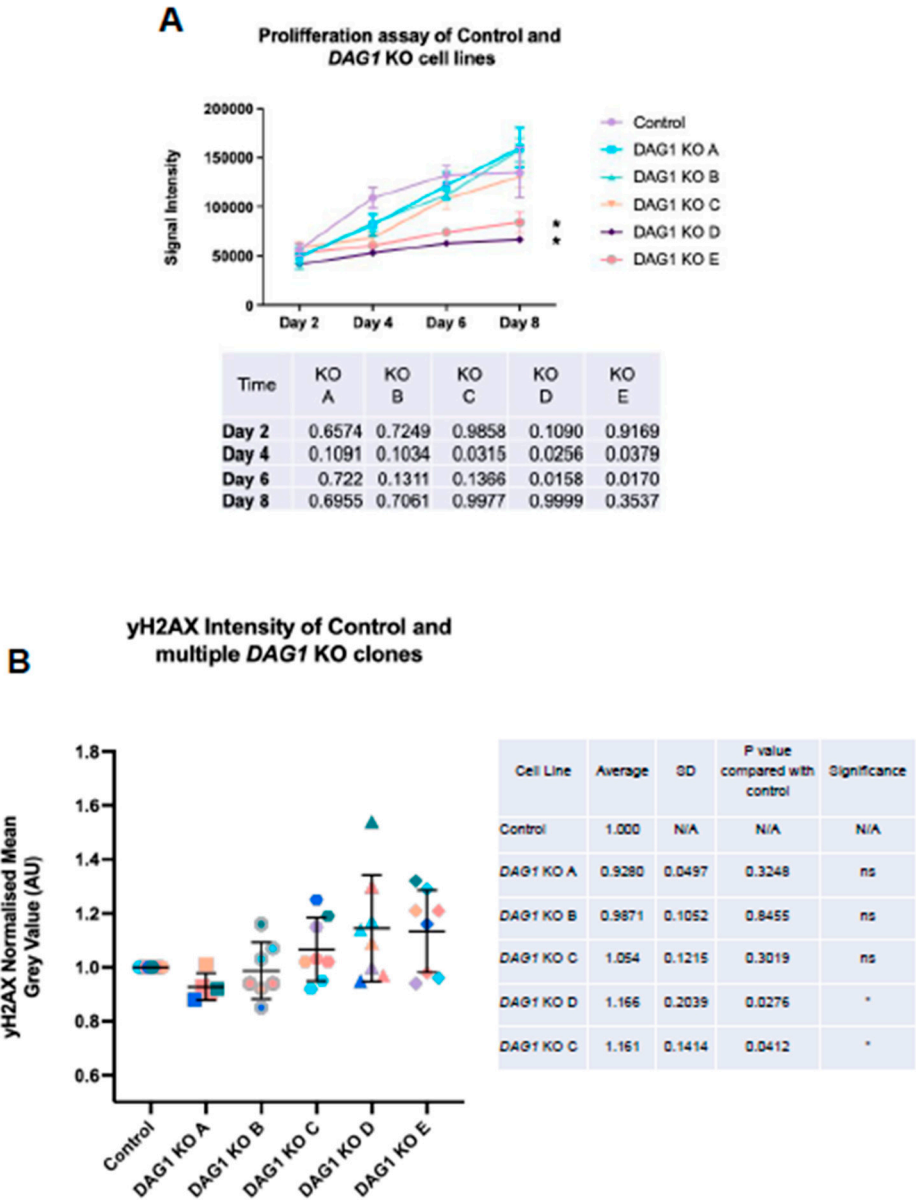

Supplementary Figure S4: DAG1 KO human myoblasts appear not to be senescent.

A. Cells were seeded and allowed to grow for 2, 4, 6 or 8 days when they were fixed. Cells were then stained with DRAQ5 to stain cell nuclei and the signal intensity of DRAQ5 was used as a measure of proliferation. 3 independent experiments were carried out. Points shows mean and standard deviation. Only DAG1 KO clones D-E grew significantly slower than the control cells while there was no statistically significant difference between control and DAG1 KO clones A-C. Statistical analysis used two-way ANOVA with Dunnett's multiple comparisons test, p values in the table.

B. Cells were plated 24 hours before fixing and staining with DAPI and an antibody against  $\gamma$ H2AX to identify the levels of DNA damage. Cells were imaged using a Leica fluorescence microscope and the nuclear  $\gamma$ H2AX signal intensity was determined for analysis. Each coloured point indicates the average for each independent experiment which was normalised to the control value. 5 independent experiments were carried out with 179 control, 179 KO A, 183 KO B, 188 KO C, 162 KO D and 150 KO E nuclei measured. Graph shows mean and standard deviation. A significant difference was determined between the samples as determined by one-way ANOVA test,  $p = <0.0179$ . p values for multiple comparisons using Dunnett's multiple comparisons test are in the table.

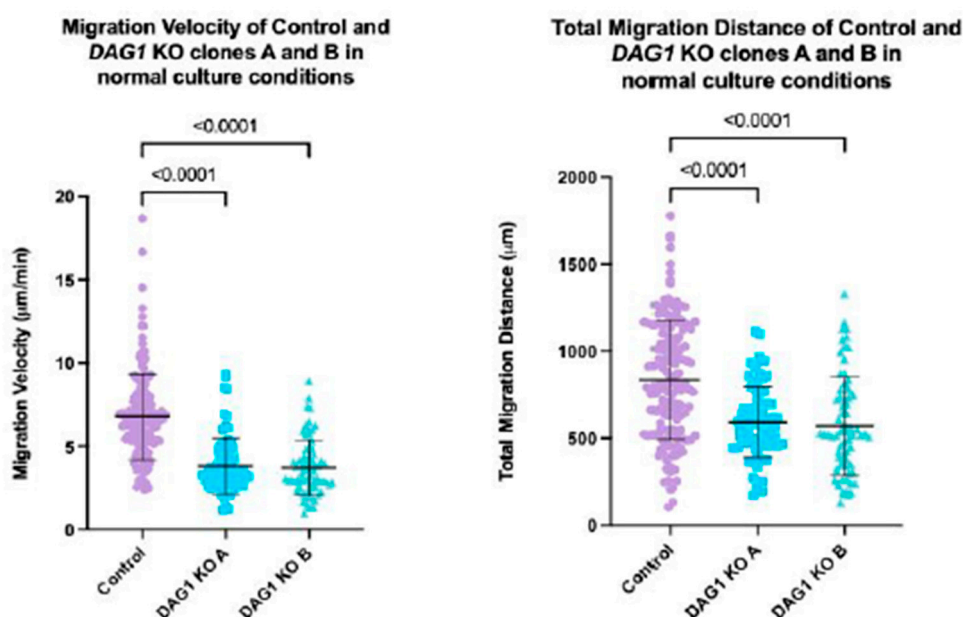

Supplementary Figure S5: Migration velocity and migration distance of DAG1 KO myoblasts

Migration velocity and migration distance of DAG1 KO myoblasts under normal culture conditions. (left) Cell velocity; (right) Total migration distance in 16 hours. Each point indicates an individual cell. 2 independent experiments were carried out with 160 control, 150 KO A and 143 KO B cells measured. Graph shows mean and standard deviation. The one-way ANOVA test with Dunnett's multiple comparison test.

## References

57. Ilsley, J.L.; Sudol, M.; Winder, S.J. The interaction of dystrophin with  $\beta$ -dystroglycan is regulated by tyrosine phosphorylation. *Cell. Signal.* 2001, 13, 625–632.
58. Pereboev, A.V.; Ahmed, N.; Man, N.T.; Morris, G.E. Epitopes in the interacting regions of  $\beta$ -dystroglycan (PPxY motif) and dystrophin (WW domain). *Biochim. Biophys. Acta—Gen. Subj.* 2001, 1527, 54–60. [https://doi.org/10.1016/s0304-4165\(01\)00147-7](https://doi.org/10.1016/s0304-4165(01)00147-7).
59. Ran, F.A.; Hsu, P.D.; Wright, J.; Agarwala, V.; Scott, D.A.; Zhang, F. Genome engineering using the CRISPR-Cas9 system. *Nat. Protoc.* 2013, 8, 2281–2308. <https://doi.org/10.1038/nprot.2013.143>.
60. Rivier, F.; Robert, A.; Hugon, G.; Bonet-Kerrache, A.; Nigro, V.; Fehrentz, J.-A.; Martinez, J.; Mornet, D. Dystrophin and utrophin complexed with different associated proteins in cardiac Purkinje fibres. *Histochem. J.* 1999, 31, 425–432. <https://doi.org/10.1023/a:1003805905456>.
